# Supplementary material for: Proximity-dependent biotin labelling reveals CP190 as an EcR/Usp molecular partner
Source: PubMed Central journal article supplement (PMC7075897; doi:10.1038/s41598-020-61514-0), 2020-03-16
Supplement: 41598_2020_61514_MOESM1_ESM.pdf [file 41598_2020_61514_MOESM1_ESM.pdf]

# Proximity-dependent biotin labelling reveals CP190 as an EcR/Usp molecular partner

Marina Yu. Mazina<sup>1</sup>, Rustam H. Ziganshin<sup>2</sup>, Mikhail D. Magnitov<sup>1,3</sup>, Anton K. Golovnin<sup>1</sup>, Nadezhda E. Vorobyeva<sup>1\*</sup>

<sup>1</sup>*Institute of Gene Biology, Russian Academy of Sciences, Moscow 119334, Russia*

<sup>2</sup>*Shemyakin-Ovchinnikov Institute of Bioorganic Chemistry, Russian Academy of Sciences, Moscow 117997, Russia*

<sup>3</sup>*Center for Precision Genome Editing and Genetic Technologies for Biomedicine, Moscow 119334, Russia*

\* *Corresponding author (email to [vorobyeva@genebiology.ru](mailto:vorobyeva@genebiology.ru))*

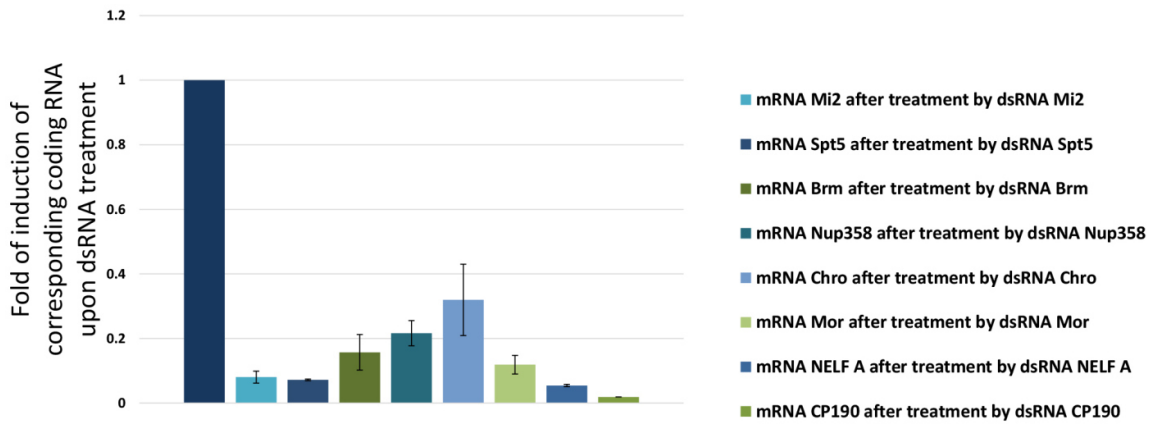

**Fig S1.** The test of efficiency of RNA interference-mediated knockdowns. Transcriptional levels were assessed by qRT-PCR. The Y-axis units represent fold of transcription induction. Data are mean values from three independent experiments, error bars represent standard deviations.

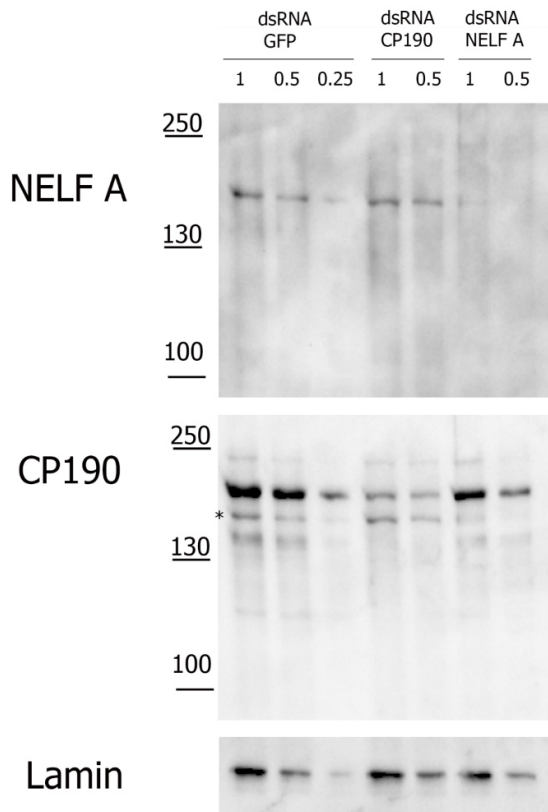

**Fig S2.** Western blots illustrating the specificity of anti-NELF A and anti CP190 antibodies. Nuclear protein extracts of S2 cells are loaded. CP190 and NELFA knockdowns were performed using corresponding dsRNA.

\* from the previous staining with anti-NELF A
